# Supplementary material for: Multifunctional tunable Cu2O and CuInS2 quantum dots on TiO2 nanotubes for efficient chemical oxidation of cholesterol and ibuprofen
Source: Royal Society of Chemistry journal article supplement (doi:10.1039/d4nr00422a), 2024-01-01
Supplement: d4nr00422a1.pdf [file d4nr00422a1.pdf]

## Supporting Information

### **Multifunctional Tunable Cu<sub>2</sub>O and CuInS<sub>2</sub> QDs on TiO<sub>2</sub> Nanotubes for Efficient Chemical Oxidation of Cholesterol and ibuprofen**

Nilem Khaliq<sup>1,2,5</sup>, Ghafar Ali<sup>3\*</sup>, Muhammad Asim Rasheed<sup>1\*</sup>, Maaz Khan<sup>3</sup>, Yi Xie<sup>4</sup>, Patrik Schmuki<sup>5\*\*</sup>, Sung Oh Cho<sup>6</sup>, Shafqat Karim<sup>3</sup>

<sup>1</sup>Department of Physics and Applied Mathematics, Pakistan Institute of Engineering and Applied Sciences (PIEAS), Islamabad 45650, Pakistan

<sup>2</sup>Department of Physics, Women University Swabi, Swabi, Khyber Pakhtunkhwa, Pakistan

<sup>3</sup>Nanomaterials Research Group (NRG), Physics Division, PINSTECH, Islamabad 44000, Pakistan

<sup>4</sup>State Key Laboratory of Silicate Materials for Architectures, Wuhan University of Technology, No. 122, Luoshi Road, Wuhan 430070, China

<sup>5</sup>Department of Materials Science and Engineering, University of Erlangen-Nuremberg, Martensstrasse 7, D-91058 Erlangen, Germany

<sup>6</sup>Department of Nuclear and Quantum Engineering (NQe), Korea Advanced Institute of Science and Technology (KAIST), Daejeon 34141, Republic of Korea

E-mail: \* [ghafarali@kaist.ac.kr](mailto:ghafarali@kaist.ac.kr), [masimr22@gmail.com](mailto:masimr22@gmail.com)

[\\*\\*schmuki@ww.uni-erlangen.de](mailto:**schmuki@ww.uni-erlangen.de)

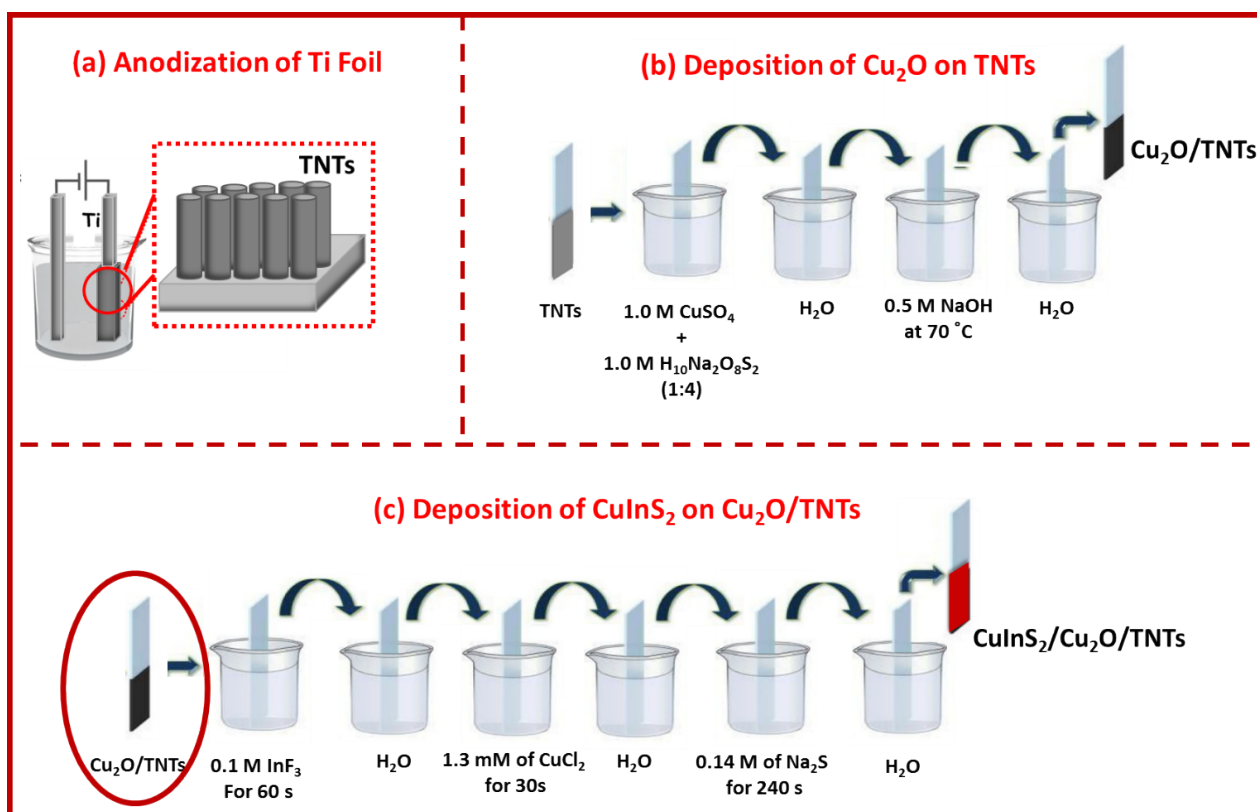

**Figure S1.** Different stages of fabrication of non-enzymatic biosensor

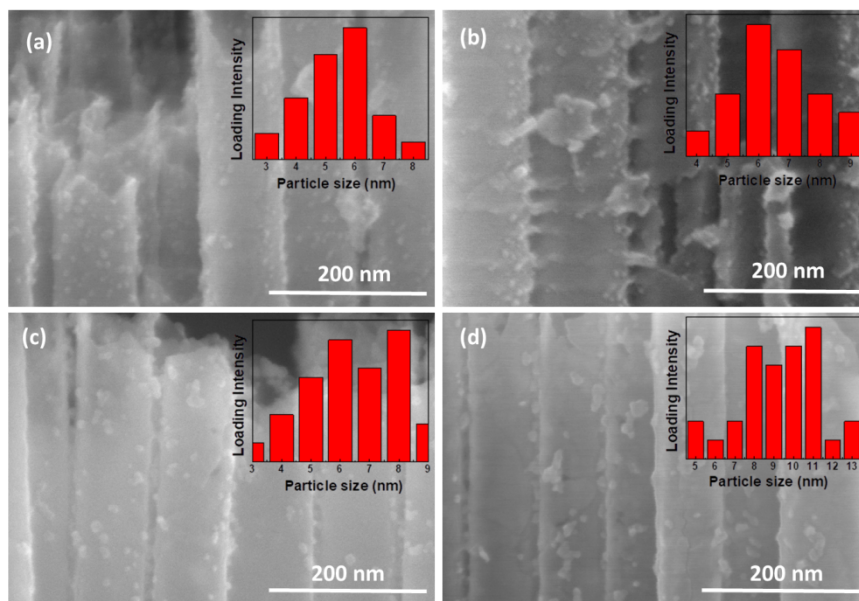

**Figure S2:** FE-SEM images showing the cross-sectional view of CuInS<sub>2</sub>/Cu<sub>2</sub>O/TNTs electrode for different decoration cycle of CuInS<sub>2</sub>QDs for (a) 2 cycles, (b) 4 cycles, (c) 6 cycles, and (d) 8 cycles. The inset (a-d) shows their corresponding QDs size distribution.

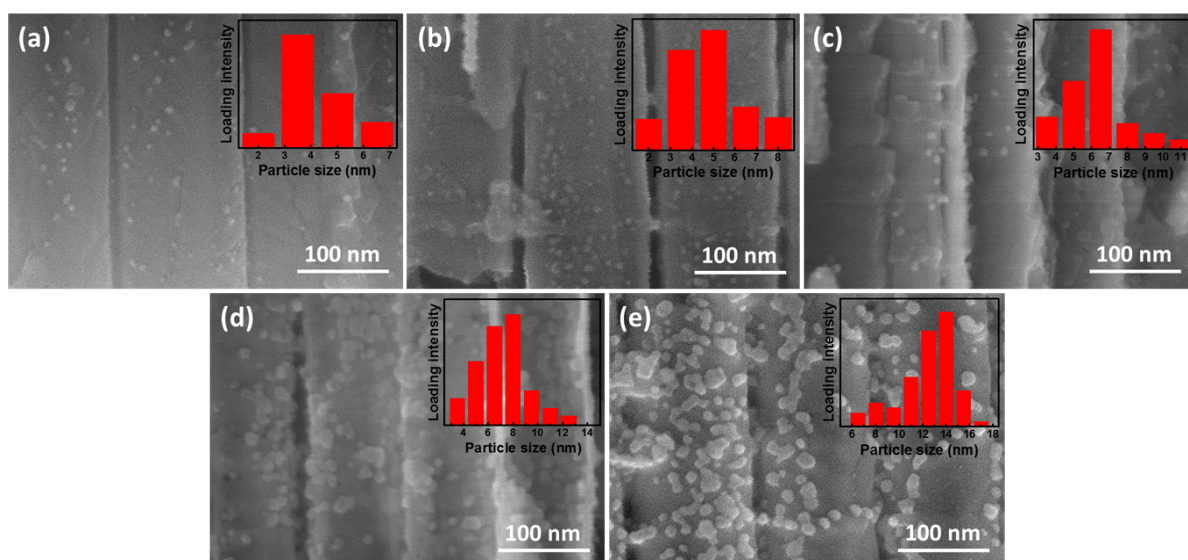

**Figure S3.** FE-SEM images showing the cross-sectional view of Cu<sub>2</sub>O/TNTs electrode decorated with Cu<sub>2</sub>O QDs for (a) 5 cycles, (b) 10 cycles, (c) 20 cycles, (d) 30 cycles, and (e) 40 cycles. The inset (a-e) shows their corresponding QDs size distribution.

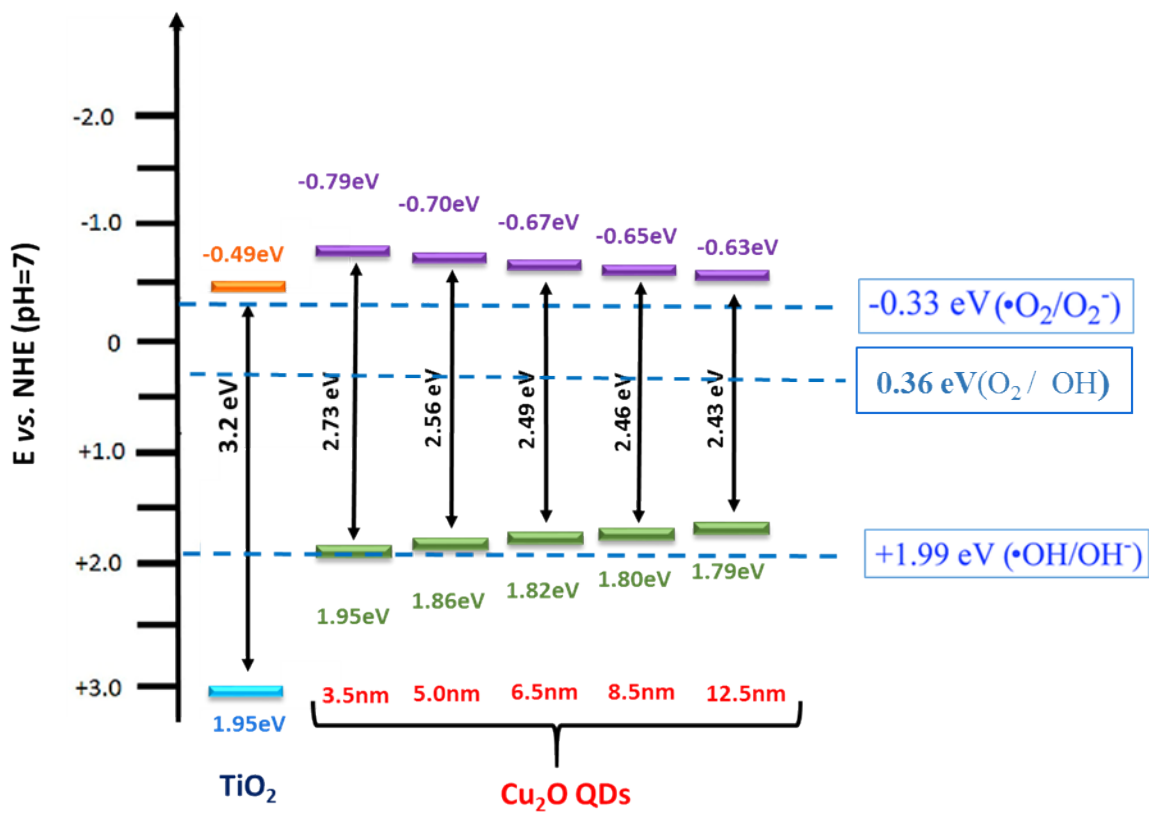

**Scheme S1:** Variation of bandgaps of Cu<sub>2</sub>O QDS with particle size.

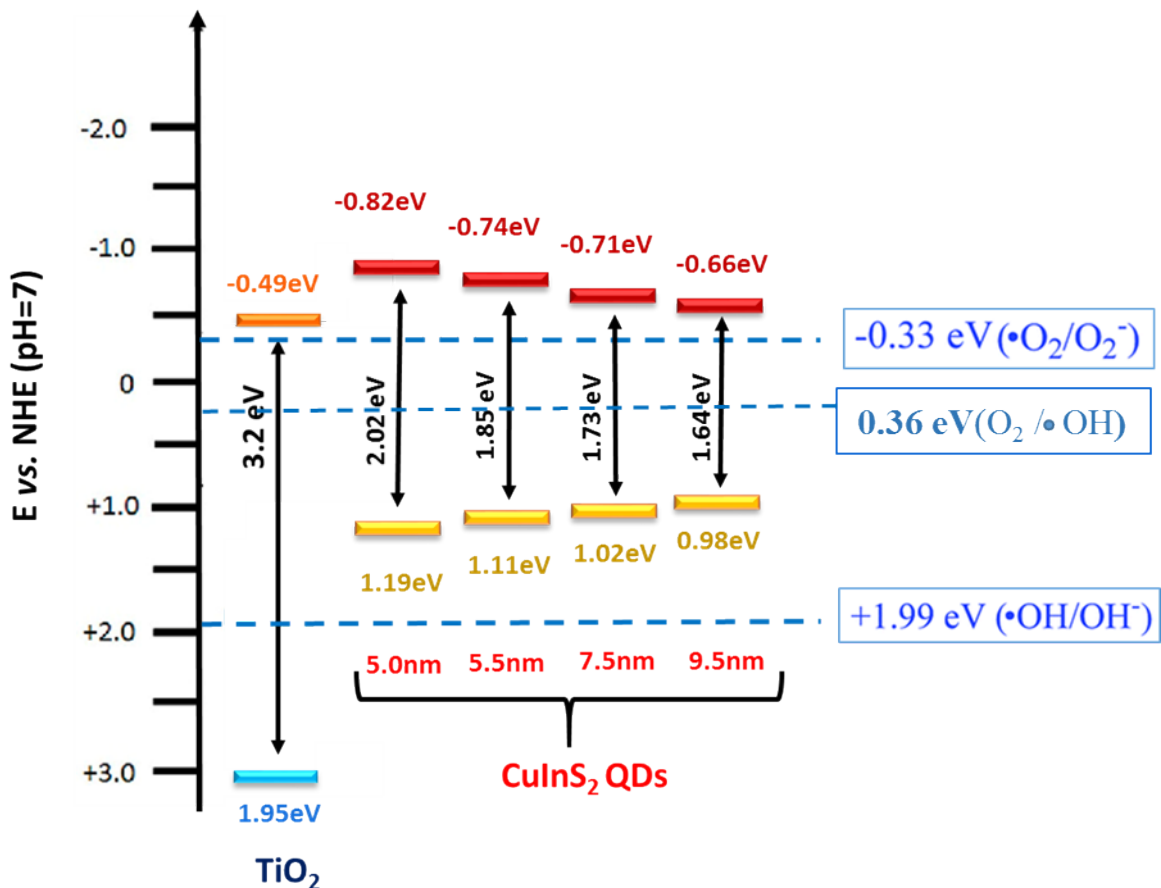

**Scheme S2:** Variation of bandgaps of CuInS<sub>2</sub> QDs with particle size.

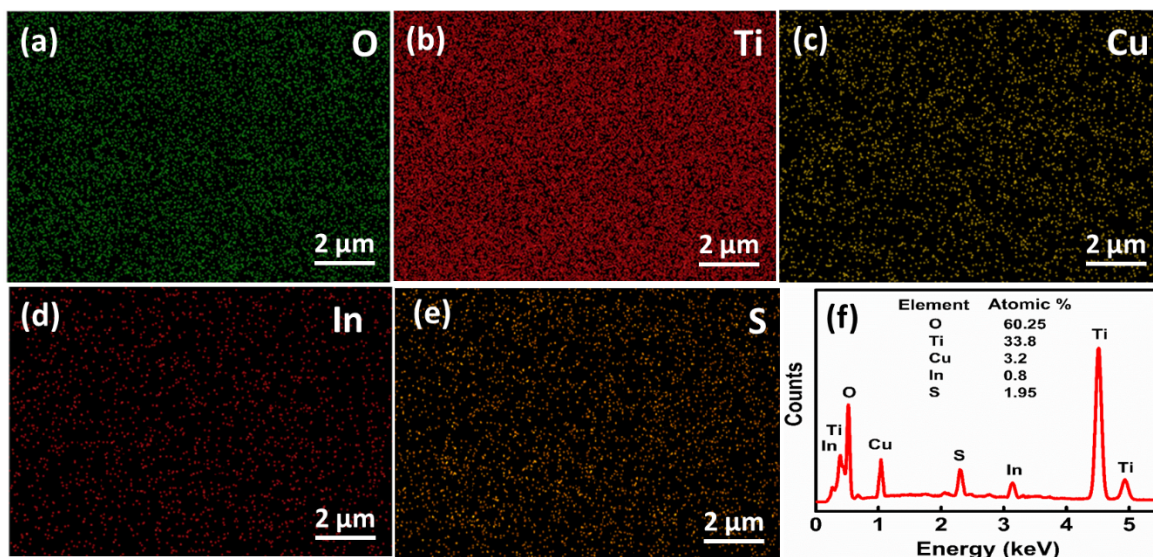

**Figure S4.** EDX elemental mapping of CuInS<sub>2</sub>/Cu<sub>2</sub>O/TNTs for (a) oxygen (O), (b) titanium (Ti), (c) copper (Cu), (d) indium (In), and (e) sulfur (S). (f) The corresponding EDX elemental spectra with atomic weight percent (%).

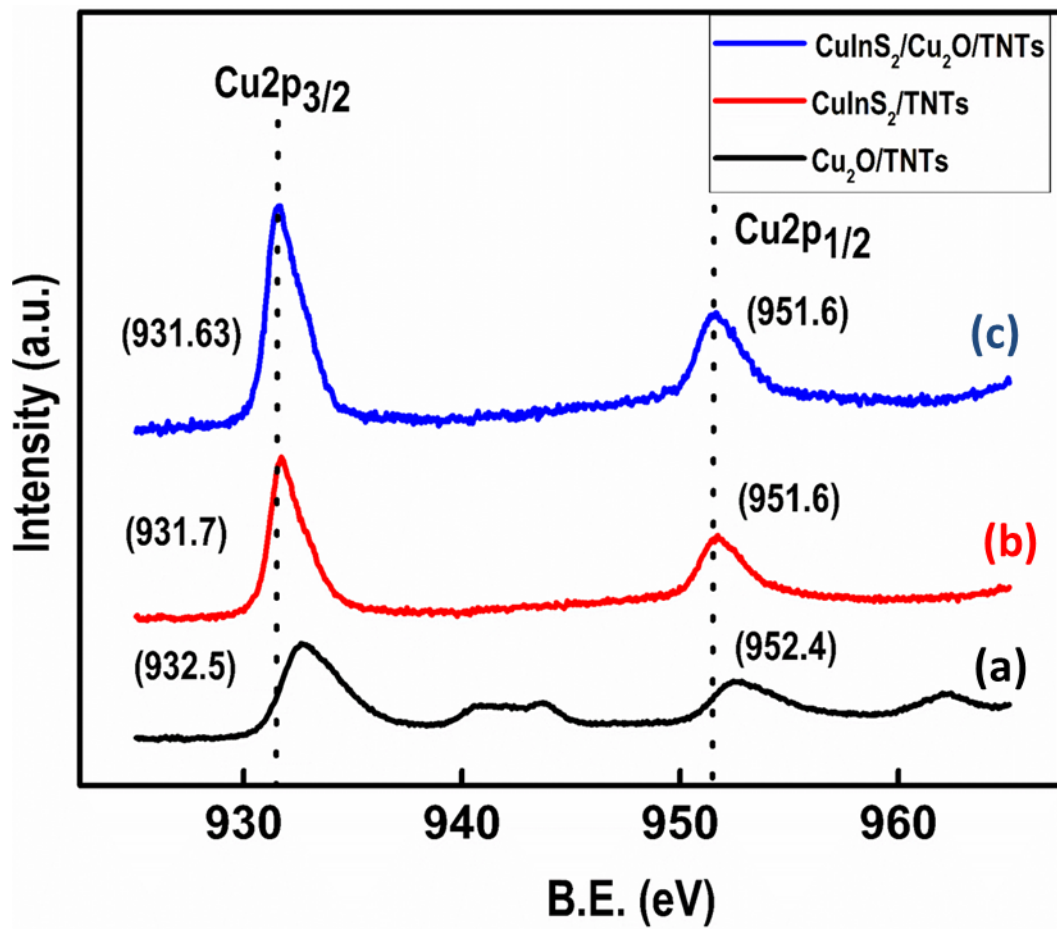

**Figure S5:** Comparison of high resolution XPS spectra of Cu<sub>2</sub>p for (a) Cu<sub>2</sub>O/TNTs, (b) CuInS<sub>2</sub>/TNTs and (c) CuInS<sub>2</sub>/Cu<sub>2</sub>O/TNTs electrodes.

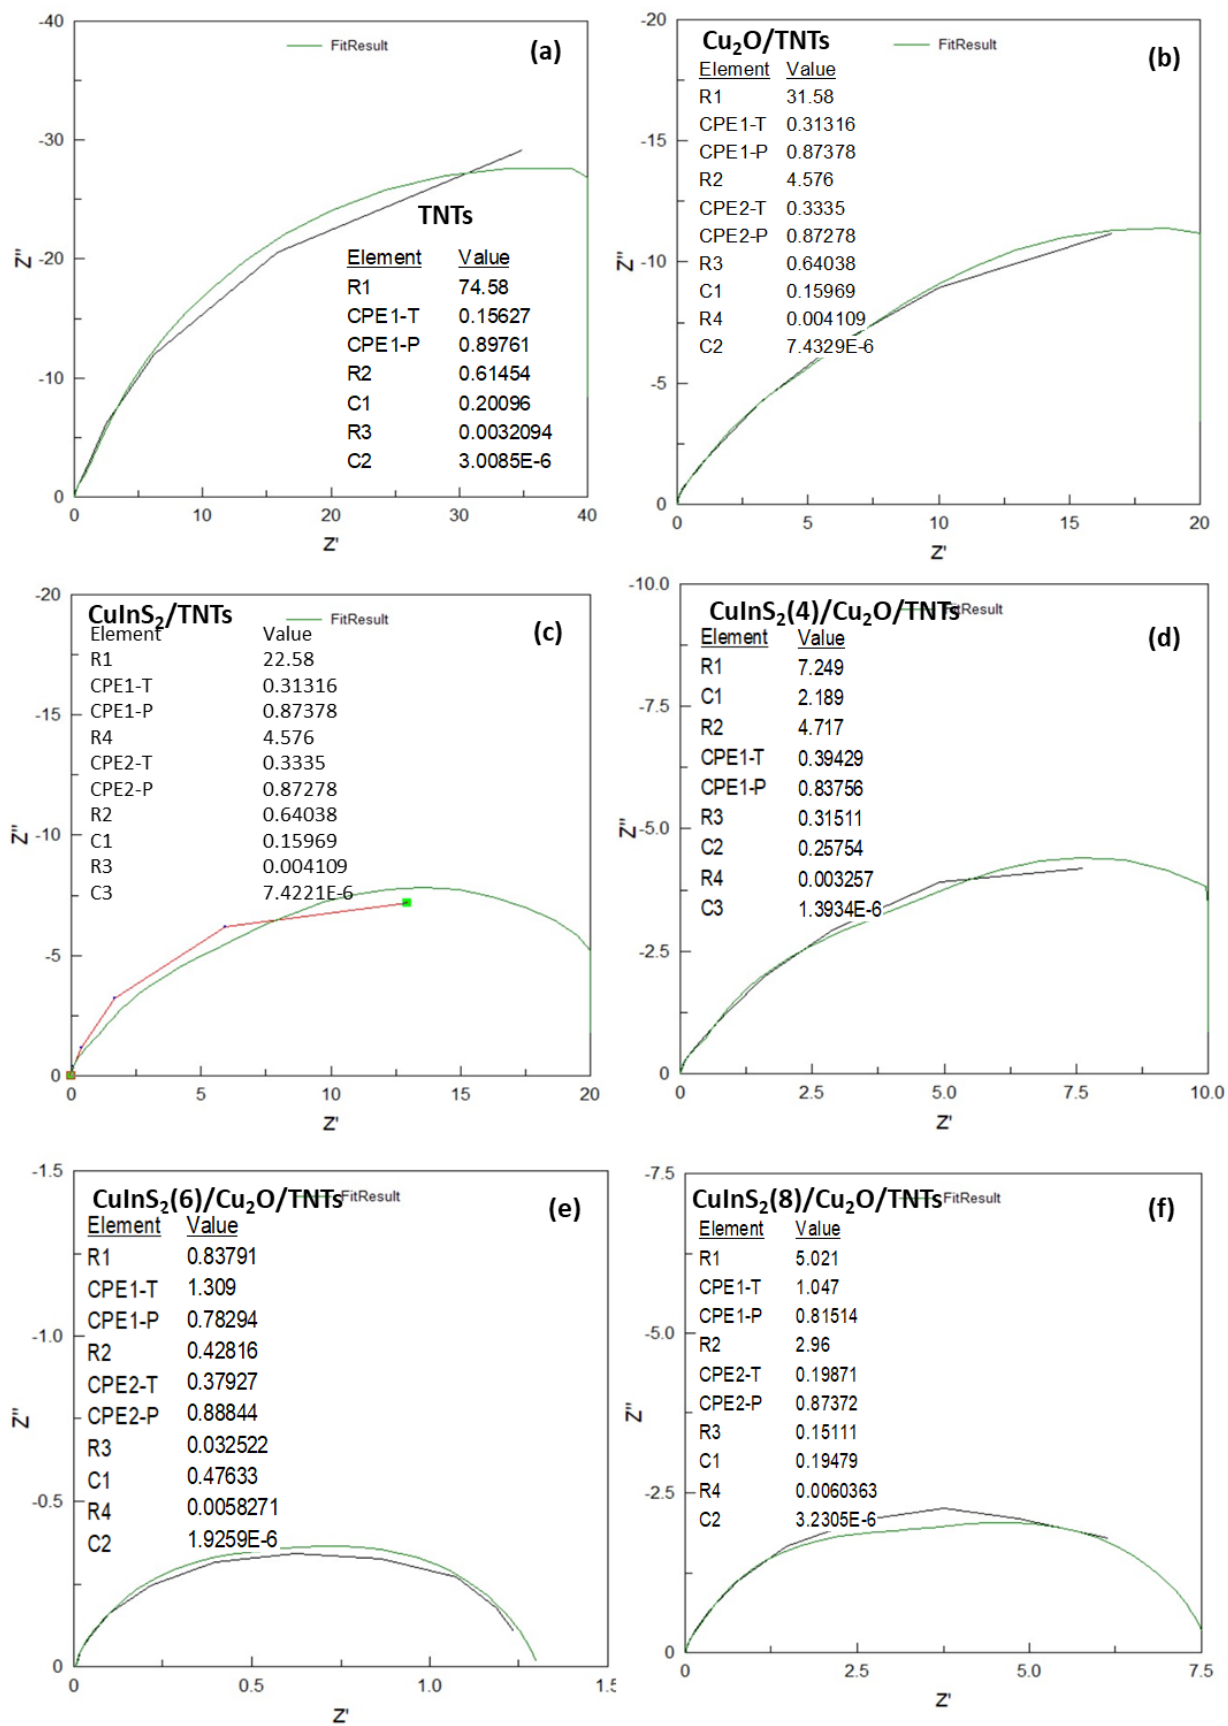

**Figure S6:** Fitted curves of EIS spectra and values of circuit parameters of (a) TNTs, (b) Cu<sub>2</sub>O/TNTs, (c) CuInS<sub>2</sub>/TNTs, (d) CuInS<sub>2</sub> (4)/Cu<sub>2</sub>O/TNTs, (e) CuInS<sub>2</sub>(6)/Cu<sub>2</sub>O/TNTs, (f) CuInS<sub>2</sub>(8)/Cu<sub>2</sub>O/TNTs.

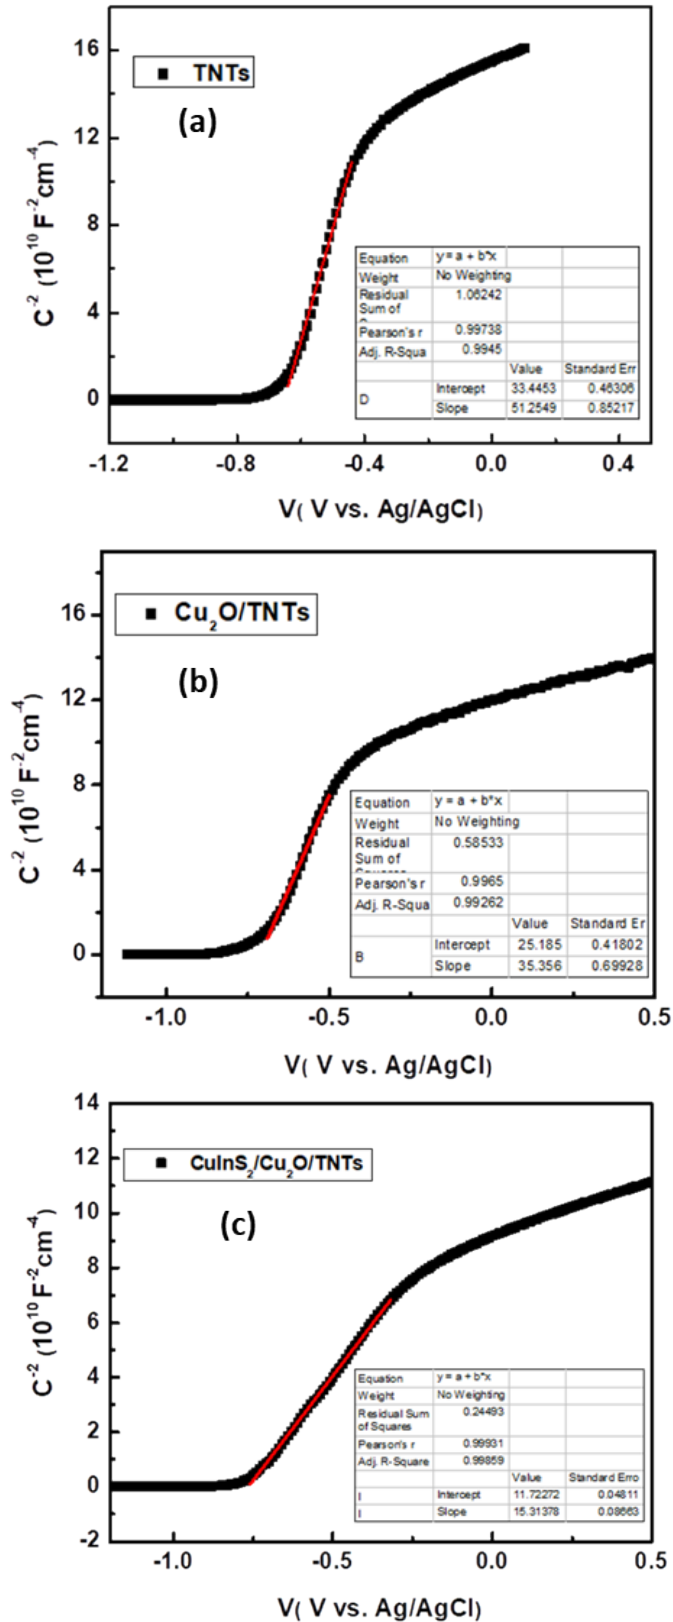

**Figure S7:** Fitting of the linear portion of the Mott-Schottky curves of (a) TNTs, (b)  $\text{Cu}_2\text{O}/\text{TNTs}$ , and (c)  $\text{CuInS}_2/\text{Cu}_2\text{O}/\text{TNTs}$ .



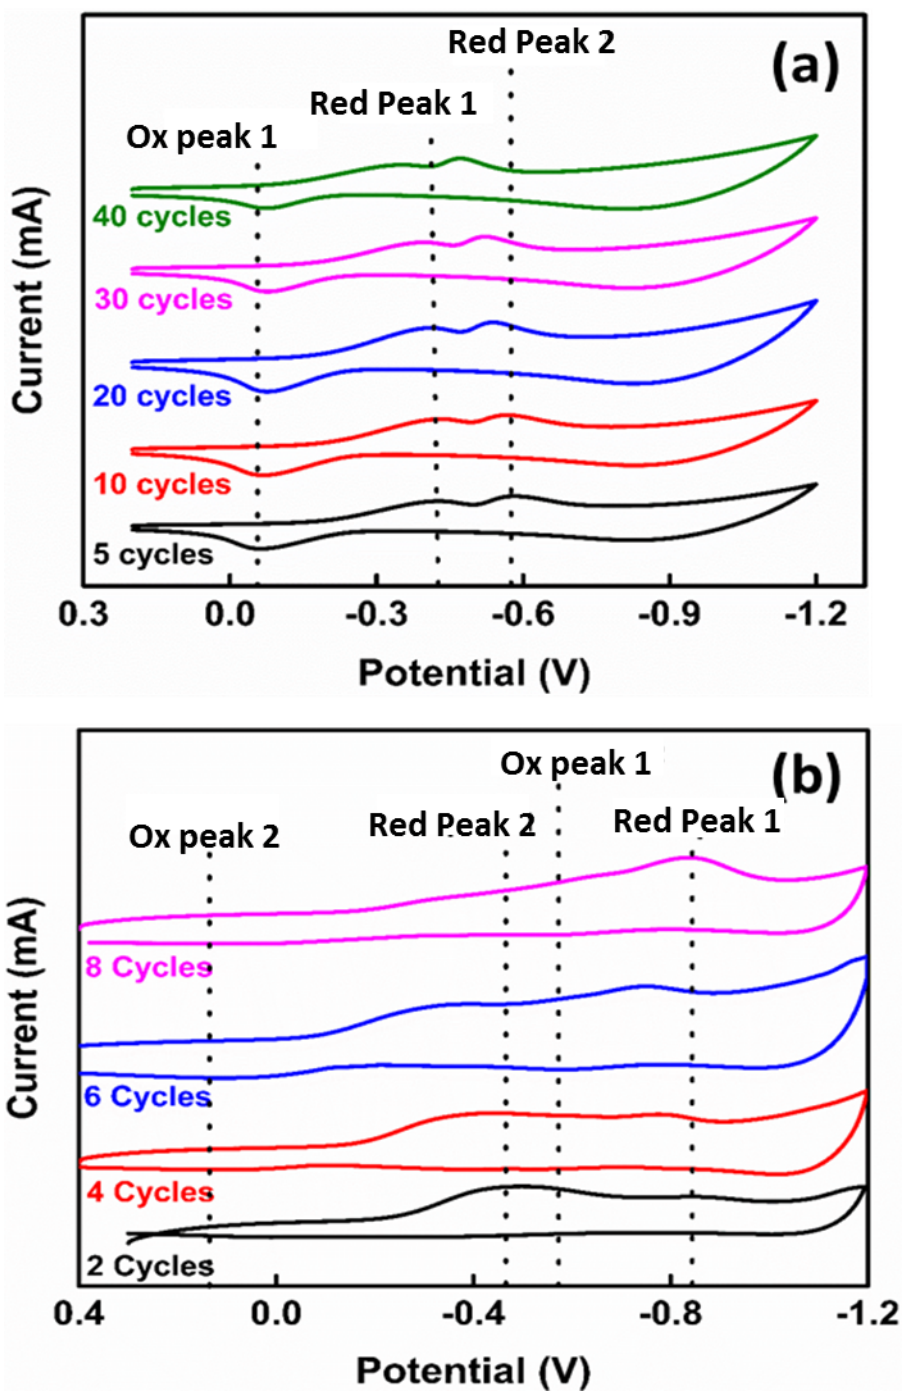

**Figure S8:** CV of (a)  $\text{Cu}_2\text{O}/\text{TNTs}$  electrode for different deposition cycles of  $\text{Cu}_2\text{O}$  QDs on TNTs, and (b)  $\text{CuInS}_2/\text{Cu}_2\text{O}/\text{TNTs}$  electrode for varying loading density of  $\text{CuInS}_2$  QDs (by keeping the  $\text{Cu}_2\text{O}$  QDs deposition fixed to 10 cycles).

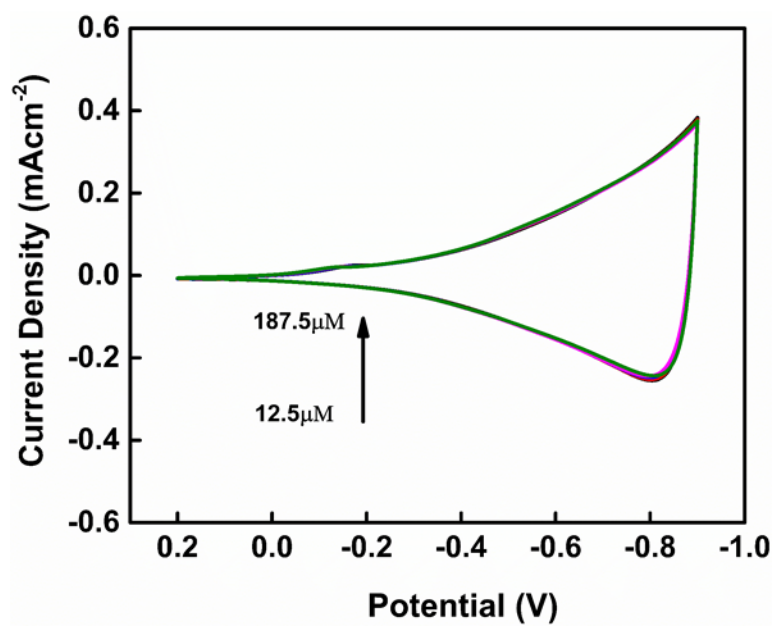

**Figure S9:** Cyclic voltammetry response studies of pristine TNTs as a function of cholesterol concentration.

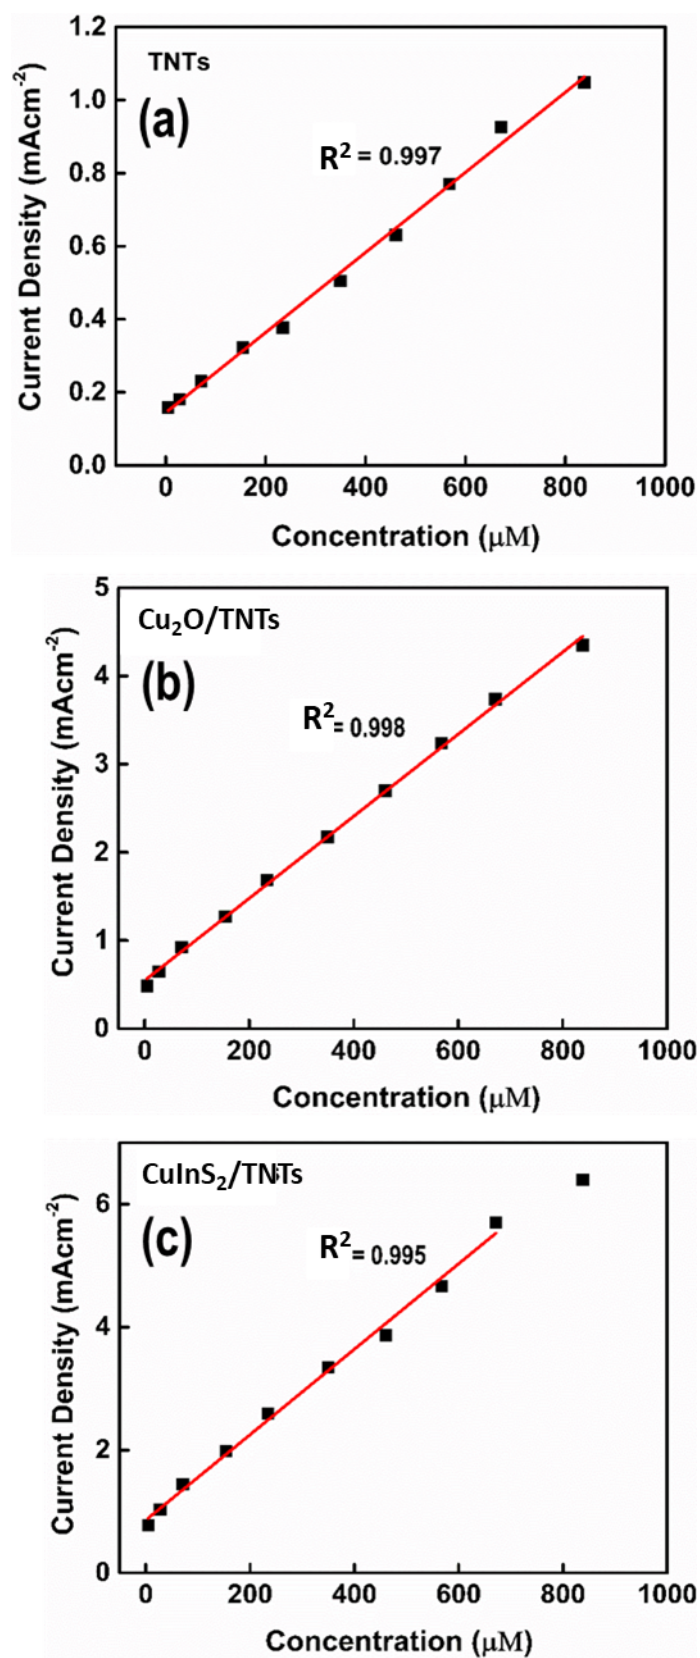

**Figure S10.** Linear fitting of the calibration curve of TNTs, Cu<sub>2</sub>O/TNTs, and CuInS<sub>2</sub>/TNTs electrode derived from their corresponding amperometric response for cholesterol detection.

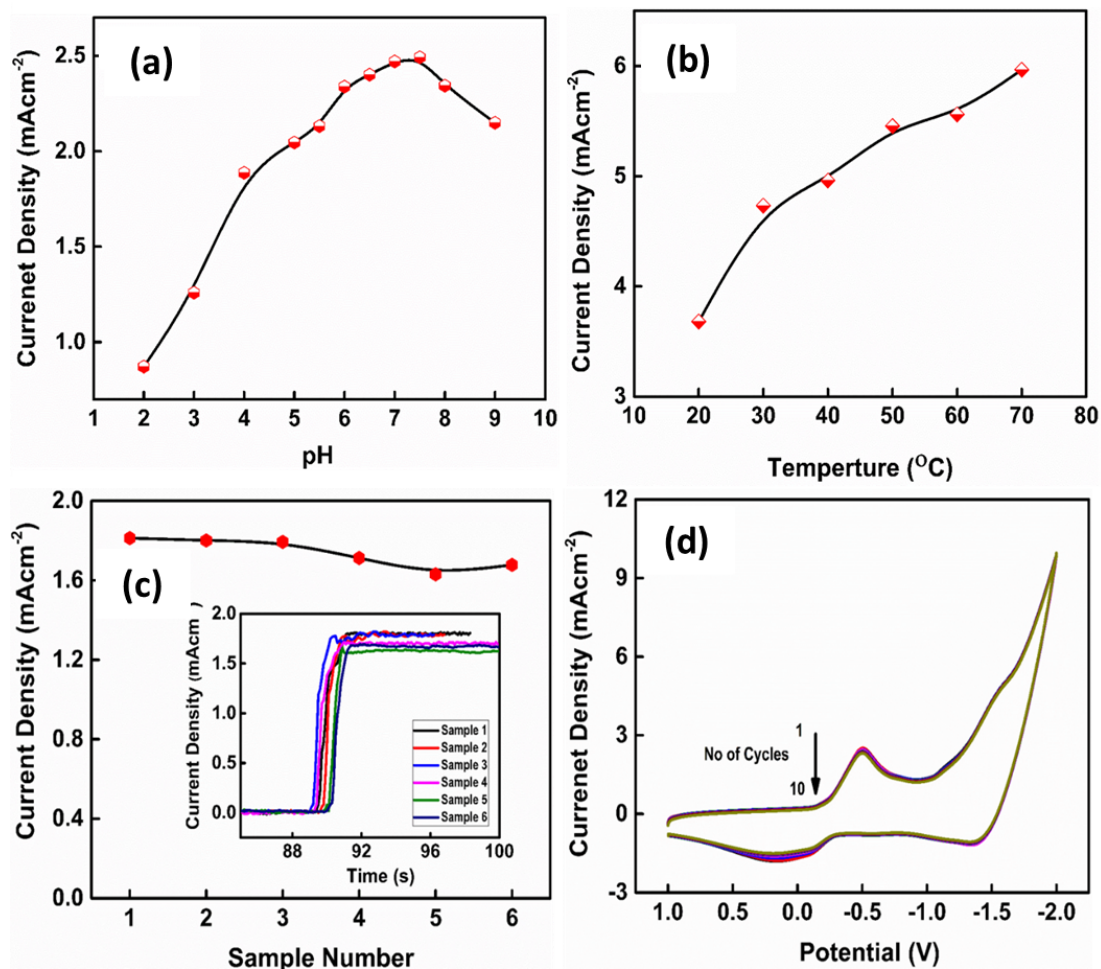

**Figure S11.** (a) Effect of pH, and (b) temperature of the electrolyte on current response of the CuInS<sub>2</sub>/Cu<sub>2</sub>O/TNTs electrode for cholesterol detection, (c) Calibration plot showing the reproducibility of CuInS<sub>2</sub>/Cu<sub>2</sub>O/TNTs electrode towards 0.25mM cholesterol for six individual samples (Sample1-Sample6). Inset shows the corresponding amperometric response, (d) CV of a single sample for 10 successive measurements.

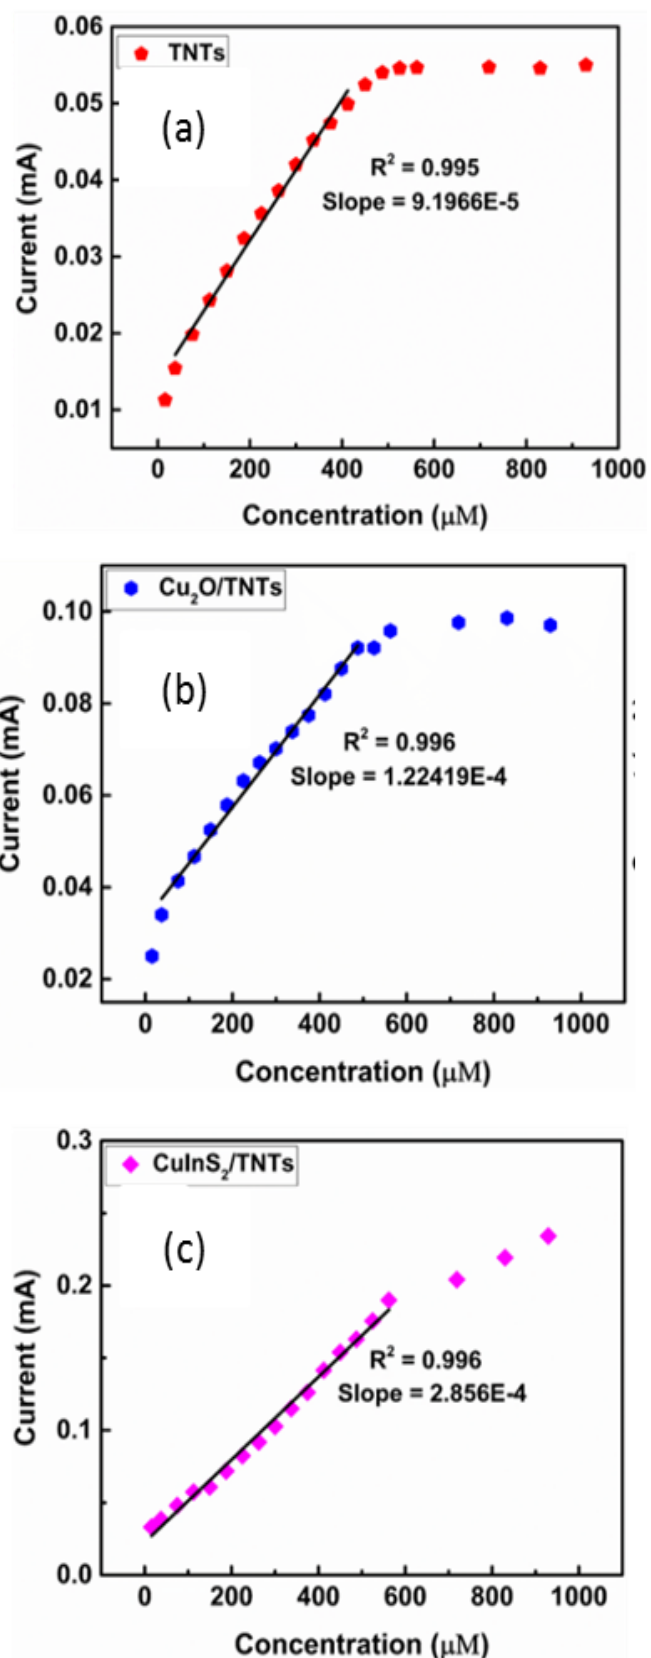

**Figure S12:** Linear fitting of the calibration curve of (a) TNTs, (b)  $Cu_2O/TNTs$ , and (c)  $CuInS_2/TNTs$  derived from their corresponding amperometric response for ibuprofen detection.

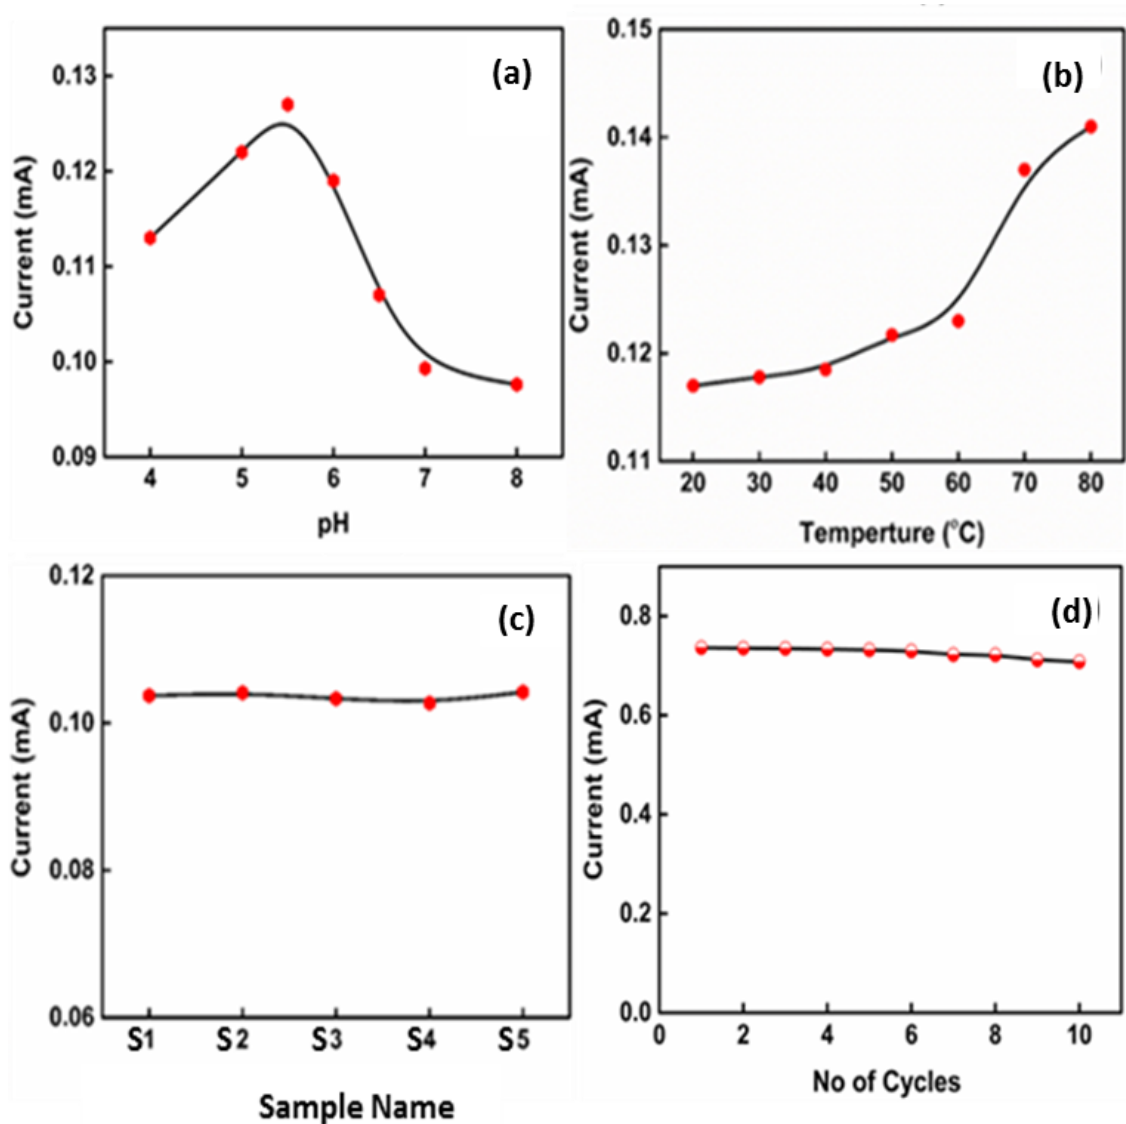

**Figure S13:** (a) Effect of pH, and (b) temperature of the electrolyte on the current response of CuInS<sub>2</sub>/Cu<sub>2</sub>O/TNTs for ibuprofen detection. Calibration plot showing the (c) reproducibility and (d) repeatability of CuInS<sub>2</sub>/Cu<sub>2</sub>O/TNTs towards 99.4 μM ibuprofen.

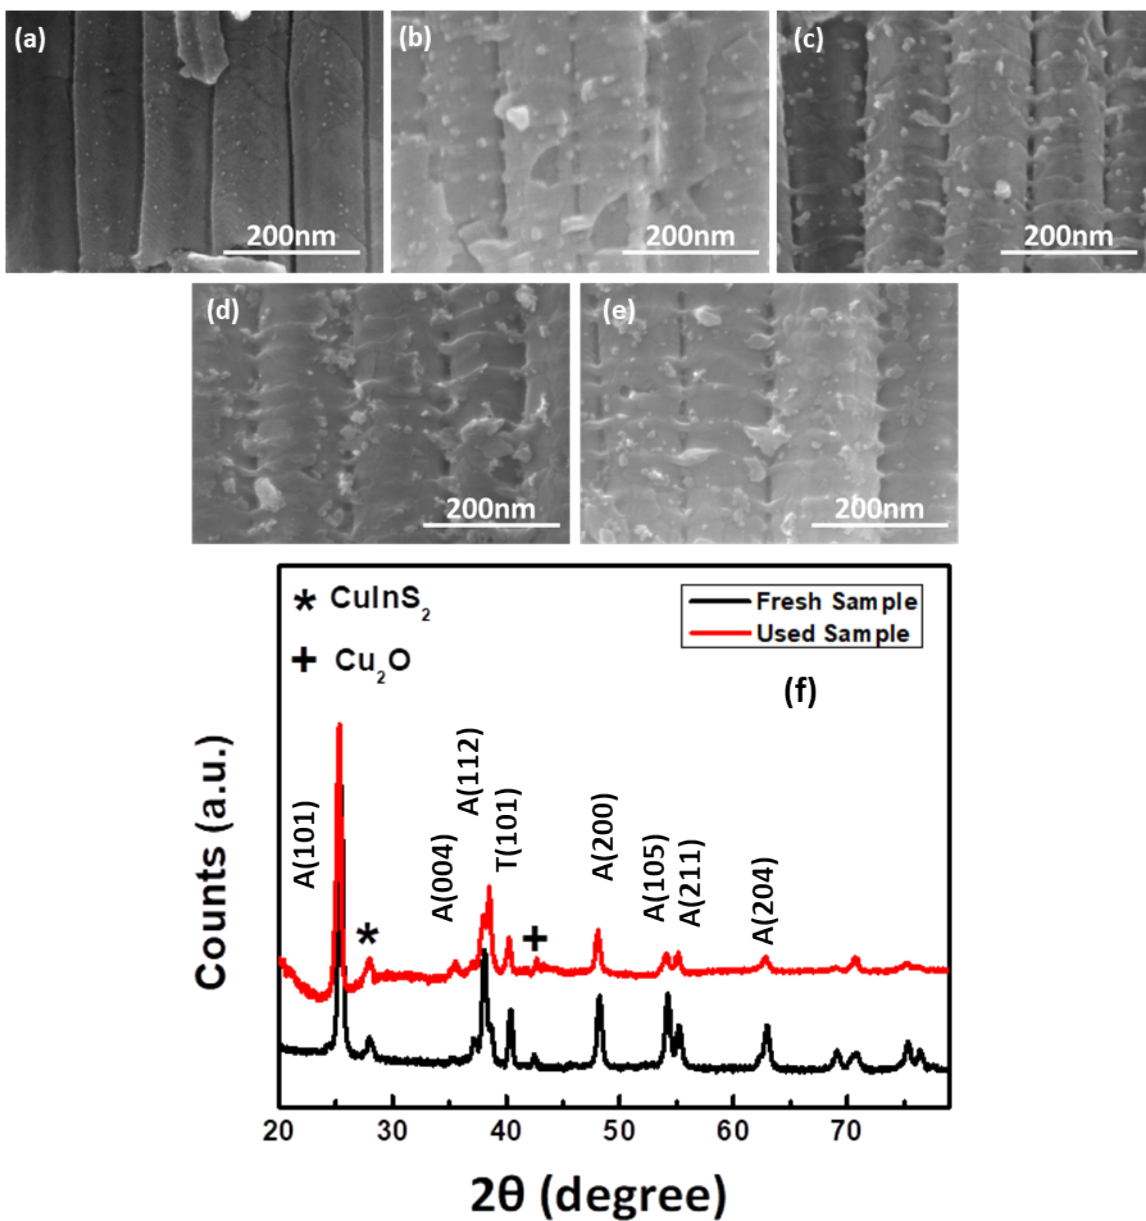

**Figure S14:** FE-SEM cross sectional images of used (a) Cu<sub>2</sub>O/TNTs, (b) CuInS<sub>2</sub>/TNTs, (c) CuInS<sub>2</sub> (4)/Cu<sub>2</sub>O/TNTs, (d) CuInS<sub>2</sub>(6)/Cu<sub>2</sub>O/TNTs, and (e) CuInS<sub>2</sub>(8)/Cu<sub>2</sub>O/TNTs. (f) Comparison between the XRD pattern of fresh and used CuInS<sub>2</sub>/Cu<sub>2</sub>O/TNTs samples.
